# Supplementary material for: A Telemonitoring Programme in Patients with Heart Failure in France: A Cost-Utility Analysis
Source: Research Square preprint supplement (doi:10.21203/rs.3.rs-1106867/v1), 2021-12-03
Supplement: Supplementary file 1 [file 4e1c9dce2e864fbef1e6a985.docx]

A Telemonitoring Programme in Patients with Heart Failure in France: A Cost-Utility Analysis

Additional Material

**Additional Table 4** Costs for healthcare resource consumption determined in the SCAD – SNDS linkage study

|  | **Management of heart failure: Per capita costs (€)** | |  |
| --- | --- | --- | --- |
|  | **12 months before** | **12 months after** | **p-value** |
|  | **N = 528** | **N = 528** |  |
| **COMMUNITY CARE (aggregated costs)** |  |  | <0.0001 (i) |
| Mean (standard deviation) | 6 026.3 (6 790.2) | 7 095.3 (7 376.3) |  |
| Median / Min / Max | 4 177.7 - 0.0 - 81 178.5 | 4 671.5 - 0.0 - 70 456.8 |  |
| **Physician consultations** |  |  | 0.0005 (i) |
| Mean (standard deviation) | 1 188.0 (1 472.8) | 1 318.5 (1 923.8) |  |
| Median / Min / Max | 829.9 - 0.0 - 14 743.4 | 966.8 - 0.0 - 25 136.1 |  |
| **Nursing and other paraclinical care** |  |  | <0.0001 (i) |
| Mean (standard deviation) | 363.0 (1 120.3) | 538.8 (1 632.1) |  |
| Median / Min / Max | 68.4 - 0.0 - 12 501.4 | 114.3 - 0.0 - 24 573.6 |  |
| **Pharmaceuticals and blood products** |  |  | <0.0001 (i) |
| Mean (standard deviation) | 1 962.9 (5 062.1) | 2 380.5 (4 704.8) |  |
| Median / Min / Max | 1 099.4 - 0.0 - 78 019.2 | 1 384.8 - 0.0 - 48 944.6 |  |
| **Medical devices** |  |  | <0.0001 (i) |
| Mean (standard deviation) | 604.8 (1 192.3) | 767.9 (1 339.5) |  |
| Median / Min / Max | 141.8 - 0.0 - 10 514.8 | 240.0 - 0.0 - 10 079.3 |  |
| **Transportation** |  |  | 0.8230 (i) |
| Mean (standard deviation) | 945.0 (2 108.1) | 1 215.7 (2 556.5) |  |
| Median / Min / Max | 229.3 - 0.0 - 21 881.2 | 195.3 - 0.0 - 17 423.6 |  |
| **Dental care** |  |  | 0.0945 (i) |
| Mean (standard deviation) | 93.6 (417.6) | 149.8 (529.0) |  |
| Median / Min / Max | 0.0 - 0.0 - 6 792.1 | 0.0 - 0.0 - 5 713.8 |  |
| **Laboratory tests** |  |  | <0.0001 (i) |
| Mean (standard deviation) | 412.6 (410.9) | 517.0 (407.9) |  |
| Median / Min / Max | 310.0 - 0.0 - 3 844.8 | 423.9 - 0.0 - 3 170.1 |  |
| **Other services** |  |  | 0.0002 (i) |
| Mean (standard deviation) | 456.3 (1 738.8) | 207.0 (1 202.4) |  |
| Median / Min / Max | 0.0 - 0.0 - 21 004.1 | 0.0 - 0.0 - 14 046.5 |  |

1. Wilcoxon test for matched analysis, (k) McNemar CHI-square test

| **Average cost of hospitalisation per capita (€)** | | | |
| --- | --- | --- | --- |
| **All users** | **Low users** | **Intermediate users** | **High users** |
| 6,540.6 | 7,366.0 | 6,065.2 | 5,783.1 |

| **Average cost of palliative care (€)** | | |
| --- | --- | --- |
| **3rd month before death** | **2nd month before death** | **Month before death** |
| 1 872 | 10 981 | 8 659 |
